# Supplementary material for: Dose Escalation Patterns of Advanced Therapies in Crohn’s Disease and Ulcerative Colitis: A Systematic Literature Review
Source: PubMed Central journal article supplement — Adv Ther. 2023 Mar 17;40(5):2051–81. doi: 10.1007/s12325-023-02457-6 (PMC10129944; doi:10.1007/s12325-023-02457-6), 2023-03-17
Supplement: 12325_2023_2457_MOESM1_ESM.pdf [file 12325_2023_2457_MOESM1_ESM.pdf]

## **Supplementary Materials**

### **Dose-escalation Patterns of Advanced Therapies in Crohn's Disease and Ulcerative Colitis: A Systematic Literature Review**

#### **Authors:**

Remo Panaccione<sup>1</sup>, Wan-Ju Lee<sup>2</sup>, Ryan Clark<sup>2</sup>, Kristina Kligys<sup>2</sup>, Rhiannon I. Campden<sup>3</sup>, Stacy Grieve<sup>3</sup>, Tim Raine<sup>4</sup>

1. Division of Gastroenterology and Hepatology, Inflammatory Bowel Disease Unit, Cumming School of Medicine, University of Calgary, Calgary, Canada
2. AbbVie, Dept GMH1, Bldg ABV1-4NW 30802, 1 N Waukegan Road, North Chicago, IL, US
3. Cytel, Inc, Waltham, Massachusetts, US
4. Department of Gastroenterology, Addenbrooke's Hospital, Cambridge University Hospitals NHS Foundation Trust, Cambridge, UK

#### **Author contacts:**

rpanacci@ucalgary.ca

wanju.lee@abbvie.com

ryan.clark@abbvie.com

kristina.kligys@abbvie.com

rhiannon.campden@cytel.com

stacy.grieve@cytel.com

tim.raine@addenbrookes.nhs.uk

#### **Correspondence:**

Remo Panaccione

rpanacci@ucalgary.ca

Division of Gastroenterology and Hepatology, Inflammatory Bowel Disease Unit, Cumming School of Medicine, University of Calgary, Calgary, Canada

## Supplementary Appendix

Supplemental Table 1: Ovid Search Strategy CD

| Search Strategy in CD                  |                                                                                                                                                                                                                                                                                                                                                                                                                                                                                                                                                                                                                                                                                                            |                   |                                                                                                                                                                                                                                                                                                                                                                                                                                  |           |
|----------------------------------------|------------------------------------------------------------------------------------------------------------------------------------------------------------------------------------------------------------------------------------------------------------------------------------------------------------------------------------------------------------------------------------------------------------------------------------------------------------------------------------------------------------------------------------------------------------------------------------------------------------------------------------------------------------------------------------------------------------|-------------------|----------------------------------------------------------------------------------------------------------------------------------------------------------------------------------------------------------------------------------------------------------------------------------------------------------------------------------------------------------------------------------------------------------------------------------|-----------|
| Search conducted                       | 26/Oct/2021                                                                                                                                                                                                                                                                                                                                                                                                                                                                                                                                                                                                                                                                                                |                   |                                                                                                                                                                                                                                                                                                                                                                                                                                  |           |
| Databases searched                     | EBM Reviews - Cochrane Database of Systematic Reviews <2005 to October 20, 2021><br>EBM Reviews - ACP Journal Club <1991 to September 2021><br>EBM Reviews - Database of Abstracts of Reviews of Effects <1st Quarter 2016><br>EBM Reviews - Cochrane Clinical Answers <October 2021><br>EBM Reviews - Cochrane Central Register of Controlled Trials <September 2021><br>EBM Reviews - Cochrane Methodology Register <3rd Quarter 2012><br>EBM Reviews - Health Technology Assessment <4th Quarter 2016><br>EBM Reviews - NHS Economic Evaluation Database <1st Quarter 2016><br>Econlit <1886 to October 14, 2021><br>Embase <1974 to 2021 October 25><br>Ovid MEDLINE(R) ALL <1946 to October 25, 2021> |                   |                                                                                                                                                                                                                                                                                                                                                                                                                                  |           |
|                                        |                                                                                                                                                                                                                                                                                                                                                                                                                                                                                                                                                                                                                                                                                                            |                   | Term                                                                                                                                                                                                                                                                                                                                                                                                                             | Hits      |
| Population/Disease:<br>Crohn's disease | Medline                                                                                                                                                                                                                                                                                                                                                                                                                                                                                                                                                                                                                                                                                                    | 1                 | Crohn Disease/                                                                                                                                                                                                                                                                                                                                                                                                                   | 138,710   |
|                                        | Embase                                                                                                                                                                                                                                                                                                                                                                                                                                                                                                                                                                                                                                                                                                     | 2                 | Crohn disease/                                                                                                                                                                                                                                                                                                                                                                                                                   | 138,710   |
|                                        | All                                                                                                                                                                                                                                                                                                                                                                                                                                                                                                                                                                                                                                                                                                        | 3                 | (Crohn disease\$ or Crohns disease\$ or Crohn's disease\$ or cleron disease\$ or Crohn Enteritis or Crohns Enteritis or Crohn's Enteritis or Crohn Colitis or Crohns Colitis or Crohn's Colitis or Regional Enteritis or Granulomatous Enteritis or Granulomatous Colitis or Ileocolitis or Terminal Ileitis or Regional Ileitides or Regional Ileitis or enteritis regionalis or morbus crohn or regional enterocolitis).ti,ab. | 139,448   |
| <b>CD</b>                              |                                                                                                                                                                                                                                                                                                                                                                                                                                                                                                                                                                                                                                                                                                            | <b>4 or/1-3</b>   | <b>171,417</b>                                                                                                                                                                                                                                                                                                                                                                                                                   |           |
| Intervention                           | Medline                                                                                                                                                                                                                                                                                                                                                                                                                                                                                                                                                                                                                                                                                                    | 5                 | Ustekinumab/ or Adalimumab/ or Infliximab/ or Certolizumab Pegol/                                                                                                                                                                                                                                                                                                                                                                | 91,827    |
|                                        | Embase                                                                                                                                                                                                                                                                                                                                                                                                                                                                                                                                                                                                                                                                                                     | 6                 | vedolizumab/ or ustekinumab/ or adalimumab/ or infliximab/ or certolizumab pegol/                                                                                                                                                                                                                                                                                                                                                | 93,875    |
|                                        | All                                                                                                                                                                                                                                                                                                                                                                                                                                                                                                                                                                                                                                                                                                        | 7                 | (vedolizumab or ustekinumab or adalimumab\$ or infliximab\$ or certolizumab pegol).ti,ab.                                                                                                                                                                                                                                                                                                                                        | 71,189    |
|                                        |                                                                                                                                                                                                                                                                                                                                                                                                                                                                                                                                                                                                                                                                                                            | 8                 | (ENTYVIO\$ or STELARAS\$ or HUMIRAS\$ or REMICADES\$ or CIMZIA\$).ti,ab.                                                                                                                                                                                                                                                                                                                                                         | 3,151     |
|                                        |                                                                                                                                                                                                                                                                                                                                                                                                                                                                                                                                                                                                                                                                                                            | 9                 | or/5-8                                                                                                                                                                                                                                                                                                                                                                                                                           | 108,195   |
| Treated patients with CD               |                                                                                                                                                                                                                                                                                                                                                                                                                                                                                                                                                                                                                                                                                                            | <b>10 4 and 9</b> | <b>29,045</b>                                                                                                                                                                                                                                                                                                                                                                                                                    |           |
| Study Design-RWE                       |                                                                                                                                                                                                                                                                                                                                                                                                                                                                                                                                                                                                                                                                                                            | 11                | exp case-control studies/ or exp case control study/                                                                                                                                                                                                                                                                                                                                                                             | 1,451,460 |

|                                                                 |        |           |                                                                                                                                                                                                                                                    |               |
|-----------------------------------------------------------------|--------|-----------|----------------------------------------------------------------------------------------------------------------------------------------------------------------------------------------------------------------------------------------------------|---------------|
|                                                                 |        | 12        | exp cross-sectional studies/ or exp cross-sectional study/                                                                                                                                                                                         | 839,170       |
|                                                                 |        | 13        | exp cohort studies/ or exp cohort analysis/                                                                                                                                                                                                        | 3,154,999     |
|                                                                 |        | 14        | longitudinal studies/ or longitudinal study/                                                                                                                                                                                                       | 320,188       |
|                                                                 |        | 15        | prospective studies/ or prospective study/                                                                                                                                                                                                         | 1,418,355     |
|                                                                 |        | 16        | retrospective studies/ or retrospective study/                                                                                                                                                                                                     | 2,115,037     |
|                                                                 |        | 17        | observational study/                                                                                                                                                                                                                               | 361,656       |
|                                                                 |        | 18        | follow-up studies/                                                                                                                                                                                                                                 | 2,028,323     |
|                                                                 |        | 19        | clinical study/                                                                                                                                                                                                                                    | 160,689       |
|                                                                 |        | 20        | (case control or case-control).ti,ab.                                                                                                                                                                                                              | 326,263       |
|                                                                 |        | 21        | (cohort adj1 (study or studies or analysis or analyses)).ti,ab.                                                                                                                                                                                    | 691,035       |
|                                                                 |        | 22        | ((longitudinal or retrospective or prospective or cross sectional or cross-sectional) adj1 (study or studies or review or analysis or analyses or cohort\$)).ti,ab.                                                                                | 2,506,654     |
|                                                                 |        | 23        | ((follow up or follow-up or followup or observational or uncontrolled or non randomi#ed or nonrandomi#ed or non-randomi#ed or non-interventional or noninterventional or non interventional or pragmatic) adj1 (study or studies)).ti,ab.          | 511,915       |
|                                                                 |        | 24        | (registry or register or database or claims or single center or single-center or multicenter or multi-center or multi center or survey or record\$ or chart review or real world or real-world).ti,ab.                                             | 6,242,757     |
|                                                                 |        | 25        | follow up/                                                                                                                                                                                                                                         | 1,753,775     |
|                                                                 |        | 26        | cohort\$.ti,ab.                                                                                                                                                                                                                                    | 1961257       |
|                                                                 |        | 27        | 25 and 26                                                                                                                                                                                                                                          | 266,949       |
|                                                                 |        | 28        | or/11-24,27                                                                                                                                                                                                                                        | 1.2E+07       |
| <b>RWE studies in Treated patients with CD</b>                  |        | <b>29</b> | <b>10 and 28</b>                                                                                                                                                                                                                                   | <b>11,921</b> |
| Dose escalation                                                 | Embase | 30        | drug dose/ or recommended drug dose/ or repeated drug dose/ or drug dose sequence/ or drug dose reduction/ or maintenance drug dose/ or drug dose escalation/ or drug dose increase/                                                               | 190,035       |
|                                                                 | All    | 31        | ((dose or dosage or dosing or treatment\$ or therap\$) adj3 (escalat\$ or adjust\$ or increase\$ or variation\$ or pattern\$ or frequenc\$ or switch\$ or change\$ or interval\$ or optimiz\$ or optimis\$ or intensif\$ or schedule\$)).mp,af,tw. | 1,213,973     |
|                                                                 |        | 32        | 30 or 31                                                                                                                                                                                                                                           | 1,321,212     |
| <b>RWE studies reporting dosing in Treated patients with CD</b> |        | <b>33</b> | <b>29 and 32</b>                                                                                                                                                                                                                                   | <b>3,190</b>  |

|                                                                 |  |    |                                                                                                                                                                                                                                                                                                                                                                                                                              |           |
|-----------------------------------------------------------------|--|----|------------------------------------------------------------------------------------------------------------------------------------------------------------------------------------------------------------------------------------------------------------------------------------------------------------------------------------------------------------------------------------------------------------------------------|-----------|
| Irrelevant Study Design                                         |  | 34 | (addresses or bibliography or biography or case report or comment or congresses or consensus development conference or duplicate publication or editorial or guideline or in vitro or interview or lectures or letter or monograph or news or "newspaper article" or practice guideline or "review literature" or "review of reported cases" or review, academic or review, multicase or review, tutorial or twin study).pt. | 4,390,030 |
|                                                                 |  | 35 | (animals/ not (humans/ and animals/)) or (animal/ not (human/ and animal/))                                                                                                                                                                                                                                                                                                                                                  | 6,041,309 |
|                                                                 |  | 36 | case report/ or case reports/                                                                                                                                                                                                                                                                                                                                                                                                | 4,887,225 |
|                                                                 |  | 37 | 34 or 35 or 36                                                                                                                                                                                                                                                                                                                                                                                                               | 1.5E+07   |
|                                                                 |  | 38 | 33 not 37                                                                                                                                                                                                                                                                                                                                                                                                                    | 3,020     |
| Limits                                                          |  | 39 | limit 38 to english language                                                                                                                                                                                                                                                                                                                                                                                                 | 2,973     |
|                                                                 |  | 40 | limit 39 to human                                                                                                                                                                                                                                                                                                                                                                                                            | 2,809     |
|                                                                 |  | 41 | limit 40 to yr="2011 -Current"                                                                                                                                                                                                                                                                                                                                                                                               | 2,564     |
| FINAL: RWE studies reporting dosing in Treated patients with CD |  | 42 | remove duplicates from 41                                                                                                                                                                                                                                                                                                                                                                                                    | 2,140     |

Supplemental Table 2: Ovid Search Strategy UC

| Search Strategy in UC                          |                                                                                                                                                                                                                                                                                                                                                                                                                                                                                                                                                                                                                                                                                                            |             |                      |         |
|------------------------------------------------|------------------------------------------------------------------------------------------------------------------------------------------------------------------------------------------------------------------------------------------------------------------------------------------------------------------------------------------------------------------------------------------------------------------------------------------------------------------------------------------------------------------------------------------------------------------------------------------------------------------------------------------------------------------------------------------------------------|-------------|----------------------|---------|
| Search conducted                               | 26/Oct/2021                                                                                                                                                                                                                                                                                                                                                                                                                                                                                                                                                                                                                                                                                                |             |                      |         |
| Databases searched                             | EBM Reviews - Cochrane Database of Systematic Reviews <2005 to October 20, 2021><br>EBM Reviews - ACP Journal Club <1991 to September 2021><br>EBM Reviews - Database of Abstracts of Reviews of Effects <1st Quarter 2016><br>EBM Reviews - Cochrane Clinical Answers <October 2021><br>EBM Reviews - Cochrane Central Register of Controlled Trials <September 2021><br>EBM Reviews - Cochrane Methodology Register <3rd Quarter 2012><br>EBM Reviews - Health Technology Assessment <4th Quarter 2016><br>EBM Reviews - NHS Economic Evaluation Database <1st Quarter 2016><br>Econlit <1886 to October 14, 2021><br>Embase <1974 to 2021 October 25><br>Ovid MEDLINE(R) ALL <1946 to October 25, 2021> |             |                      |         |
|                                                |                                                                                                                                                                                                                                                                                                                                                                                                                                                                                                                                                                                                                                                                                                            | <b>Term</b> | <b>Hits</b>          |         |
| Population/Disease:<br>Ulcerative colitis (UC) | Medline                                                                                                                                                                                                                                                                                                                                                                                                                                                                                                                                                                                                                                                                                                    | 1           | Colitis, Ulcerative/ | 73,491  |
|                                                | Embase                                                                                                                                                                                                                                                                                                                                                                                                                                                                                                                                                                                                                                                                                                     | 2           | ulcerative colitis/  | 117,712 |

|                                 |         |                                                                                                                                                                                                                                           |                                                                                                                                                                                                                    |                |
|---------------------------------|---------|-------------------------------------------------------------------------------------------------------------------------------------------------------------------------------------------------------------------------------------------|--------------------------------------------------------------------------------------------------------------------------------------------------------------------------------------------------------------------|----------------|
|                                 | All     | 3                                                                                                                                                                                                                                         | (ulcerative colitis or Idiopathic Proctocolitis or Colitis Gravis or colitis ulcerosa or colitis ulcerativa or mucosal colitis or ulcerative coloproctitis or ulcerative proctocolitis or ulcerous colitis).ti,ab. | 113,897        |
| <b>UC</b>                       |         | <b>4</b>                                                                                                                                                                                                                                  | <b>or/1-3</b>                                                                                                                                                                                                      | <b>143,592</b> |
| <b>Intervention</b>             | Medline | 5                                                                                                                                                                                                                                         | Ustekinumab/ or Adalimumab/ or Infliximab/                                                                                                                                                                         | 89,860         |
|                                 | Embase  | 6                                                                                                                                                                                                                                         | vedolizumab/ or ustekinumab/ or adalimumab/ or infliximab/ or tofacitinib/ or ozanimod/ or golimumab/                                                                                                              | 97,560         |
|                                 | All     | 7                                                                                                                                                                                                                                         | (vedolizumab or ustekinumab or adalimumab\$ or infliximab\$ or tofacitinib or tasocitinib or ozanimod or golimumab).ti,ab.                                                                                         | 77,000         |
|                                 |         | 8                                                                                                                                                                                                                                         | (ENTYVIO\$ or STELARAS\$ or HUMIRAS\$ or REMICADES\$ or XELJANZ\$ or ZEPOSIA\$ or SIMPONI\$).ti,ab.                                                                                                                | 3,197          |
|                                 |         | 9                                                                                                                                                                                                                                         | or/5-8                                                                                                                                                                                                             | 114,821        |
| <b>Treated patients with UC</b> |         | <b>10</b>                                                                                                                                                                                                                                 | <b>4 and 9</b>                                                                                                                                                                                                     | <b>18,434</b>  |
| <b>Study Design-RWE</b>         |         | 11                                                                                                                                                                                                                                        | exp case-control studies/ or exp case control study/                                                                                                                                                               | 1,451,460      |
|                                 |         | 12                                                                                                                                                                                                                                        | exp cross-sectional studies/ or exp cross-sectional study/                                                                                                                                                         | 839,170        |
|                                 |         | 13                                                                                                                                                                                                                                        | exp cohort studies/ or exp cohort analysis/                                                                                                                                                                        | 3,154,999      |
|                                 |         | 14                                                                                                                                                                                                                                        | longitudinal studies/ or longitudinal study/                                                                                                                                                                       | 320,188        |
|                                 |         | 15                                                                                                                                                                                                                                        | prospective studies/ or prospective study/                                                                                                                                                                         | 1,418,355      |
|                                 |         | 16                                                                                                                                                                                                                                        | retrospective studies/ or retrospective study/                                                                                                                                                                     | 2,115,037      |
|                                 |         | 17                                                                                                                                                                                                                                        | observational study/                                                                                                                                                                                               | 361,656        |
|                                 |         | 18                                                                                                                                                                                                                                        | follow-up studies/                                                                                                                                                                                                 | 2,028,323      |
|                                 |         | 19                                                                                                                                                                                                                                        | clinical study/                                                                                                                                                                                                    | 160,689        |
|                                 |         | 20                                                                                                                                                                                                                                        | (case control or case-control).ti,ab.                                                                                                                                                                              | 326,263        |
|                                 |         | 21                                                                                                                                                                                                                                        | (cohort adj1 (study or studies or analysis or analyses)).ti,ab.                                                                                                                                                    | 691,035        |
|                                 | 22      | ((longitudinal or retrospective or prospective or cross sectional or cross-sectional) adj1 (study or studies or review or analysis or analyses or cohort\$)).ti,ab.                                                                       | 2,506,654                                                                                                                                                                                                          |                |
|                                 | 23      | ((follow up or follow-up or followup or observational or uncontrolled or non randomi#ed or nonrandomi#ed or non-randomi#ed or non-interventional or noninterventional or non interventional or pragmatic) adj1 (study or studies)).ti,ab. | 511,915                                                                                                                                                                                                            |                |
|                                 | 24      | (registry or register or database or claims or single center or single-center or multicenter or multi-center or multi center or survey or record\$ or chart review or real world or real-world).ti,ab.                                    | 6,242,757                                                                                                                                                                                                          |                |
|                                 | 25      | follow up/                                                                                                                                                                                                                                | 1,753,775                                                                                                                                                                                                          |                |
|                                 | 26      | cohort\$.ti,ab.                                                                                                                                                                                                                           | 1,961,257                                                                                                                                                                                                          |                |

|                                                                        |               |    |                                                                                                                                                                                                                                                                                                                                                                                                                              |                              |
|------------------------------------------------------------------------|---------------|----|------------------------------------------------------------------------------------------------------------------------------------------------------------------------------------------------------------------------------------------------------------------------------------------------------------------------------------------------------------------------------------------------------------------------------|------------------------------|
|                                                                        |               | 27 | 25 and 26                                                                                                                                                                                                                                                                                                                                                                                                                    | 266,949                      |
|                                                                        |               | 28 | or/11-24,27                                                                                                                                                                                                                                                                                                                                                                                                                  | 1.2E+07                      |
| <b>RWE studies in Treated patients with UC</b>                         |               | 29 | <b>10 and 28</b>                                                                                                                                                                                                                                                                                                                                                                                                             | <b>8,233</b>                 |
| <b>Dosing</b>                                                          | Embase        | 30 | drug dose/ or recommended drug dose/ or repeated drug dose/ or drug dose sequence/ or drug dose reduction/ or maintenance drug dose/ or drug dose escalation/ or drug dose increase/                                                                                                                                                                                                                                         | 190,035                      |
|                                                                        | All           | 31 | ((dose or dosage or dosing or treatment\$ or therap\$) adj3 (escalat\$ or adjust\$ or increase\$ or variation\$ or pattern\$ or frequenc\$ or switch\$ or change\$ or interval\$ or optimiz\$ or optimis\$ or intensif\$ or schedule\$)).mp,af,tw.                                                                                                                                                                           | 1,213,973                    |
|                                                                        |               | 32 | 30 or 31                                                                                                                                                                                                                                                                                                                                                                                                                     | 1,321,212                    |
|                                                                        |               | 33 | <b>29 and 32</b>                                                                                                                                                                                                                                                                                                                                                                                                             | <b>2,116</b>                 |
| <b>Irrelevant Study Design</b>                                         |               | 34 | (addresses or bibliography or biography or case report or comment or congresses or consensus development conference or duplicate publication or editorial or guideline or in vitro or interview or lectures or letter or monograph or news or "newspaper article" or practice guideline or "review literature" or "review of reported cases" or review, academic or review, multicase or review, tutorial or twin study).pt. | 4,390,030                    |
|                                                                        |               | 35 | (animals/ not (humans/ and animals/)) or (animal/ not (human/ and animal/))                                                                                                                                                                                                                                                                                                                                                  | 6,041,309                    |
|                                                                        |               | 36 | case report/ or case reports/                                                                                                                                                                                                                                                                                                                                                                                                | 4,887,225                    |
|                                                                        |               | 37 | 34 or 35 or 36                                                                                                                                                                                                                                                                                                                                                                                                               | 1.5E+07                      |
|                                                                        |               | 38 | 33 not 37                                                                                                                                                                                                                                                                                                                                                                                                                    | 2,003                        |
|                                                                        | <b>Limits</b> |    | 39                                                                                                                                                                                                                                                                                                                                                                                                                           | limit 38 to english language |
|                                                                        |               | 40 | limit 39 to human                                                                                                                                                                                                                                                                                                                                                                                                            | 1,883                        |
|                                                                        |               | 41 | limit 40 to yr="2011 -Current"                                                                                                                                                                                                                                                                                                                                                                                               | 1,793                        |
| <b>FINAL: RWE studies reporting dosing in Treated patients with UC</b> |               | 42 | <b>remove duplicates from 41</b>                                                                                                                                                                                                                                                                                                                                                                                             | <b>1,522</b>                 |

Supplemental Table 3: Reported reasons for dose escalation in CD publications

| Intervention       | N of studies reporting | Reason for dose escalation                                                                                                                 |
|--------------------|------------------------|--------------------------------------------------------------------------------------------------------------------------------------------|
| Ustekinumab        | 13                     | Partial response, no response, loss of response [28-41]                                                                                    |
|                    | 1                      | Low UST trough levels [39]                                                                                                                 |
|                    | 1                      | Maintain clinical remission/response [102]                                                                                                 |
|                    | 1                      | Decision was reached jointly by patient and clinician based on patient's prior history and management preferences [91]                     |
| Vedolizumab        | 6                      | Partial response, no response, loss of response [42-52]                                                                                    |
|                    | 2                      | No response at week 6 [113, 115]                                                                                                           |
|                    | 1                      | Non-remitters; discretion of the treating provider [114]                                                                                   |
| Certolizumab pegol | 1                      | Partial response, no response, loss of response [89, 90]                                                                                   |
| Adalimumab         | 16                     | Partial response, no response, loss of response [53-75]                                                                                    |
|                    | 1                      | Endoscopic and morphological recurrence [121]                                                                                              |
|                    | 1                      | Deterioration in clinical symptoms [125]                                                                                                   |
|                    | 1                      | Maintenance of clinical response, loss of response, CRP re-elevation [126]                                                                 |
|                    | 1                      | Based on clinical and biochemical responses [128]                                                                                          |
| Infliximab         | 18                     | Partial response, no response, loss of response [53, 54, 64, 65, 67, 69, 73-88]                                                            |
|                    | 1                      | Decided by discussion by physicians and patients [226]                                                                                     |
|                    | 1                      | Serum IFX levels [136]                                                                                                                     |
|                    | 1                      | Treating physician's clinical judgment on whether the patient's current therapy failed to provide adequate therapeutic response [212, 213] |
|                    | 1                      | Lack of effectiveness, adverse events [132]                                                                                                |
|                    | 1                      | Based on clinical and biochemical responses [128]                                                                                          |

Abbreviations: CD, Crohn's disease; CRP, C reactive protein; IFX, infliximab; N, number within the overall population; UST, ustekinumab.

Supplemental Table 4: Ustekinumab Dose Escalation Patterns by Region, Crohn's disease

| Maintenance pattern at the start of study*   | Maintenance pattern at follow-up | Studies recording pattern (n) | Proportion of patients, median % (range)† |
|----------------------------------------------|----------------------------------|-------------------------------|-------------------------------------------|
| <b>Interval Shortening (n=24)</b>            |                                  |                               |                                           |
| <b>US &amp; Canada</b>                       |                                  |                               |                                           |
| 90 mg q8w<br>[30, 31, 39, 91, 92, 95-97, 99] | 90 mg q4w                        | 7                             | 27% (17 to 77%)                           |
| 90 mg q8w<br>[95, 96, 99]                    | 90 mg q6w                        | 1                             | 23%                                       |
| 45 mg q12w<br>[98]                           | 90 mg q8w                        | 1                             | 100%                                      |
| <b>Outside of North America</b>              |                                  |                               |                                           |
| 90 mg q12w <sup>e</sup>                      | 90 mg q8w                        | 4                             | 43% (21 to 50%)                           |

|                                                          |                        |   |                 |
|----------------------------------------------------------|------------------------|---|-----------------|
| [36, 37, 105, 106, 108, 209-211, 230]                    |                        |   |                 |
| 90 mg q8w <sup>ε</sup><br>[29, 33, 35, 40, 101, 103-108] | 90 mg q4w <sup>†</sup> | 5 | 24% (11 to 33%) |
| 90 mg q8w<br>[35, 103-106]                               | 90 mg q6w              | 3 | 4% (1 to 14%)   |
| 90 mg q12<br>[105, 106, 209, 210, 230]                   | 90 mg q4w              | 1 | 11%             |
| 45 mg q12w<br>[35]                                       | 45 mg q8w              | 1 | 25%             |
| 45 mg q8w<br>[35]                                        | 45 mg q6w              | 1 | 11%             |
| <b>Dose strength increase (n=2)<sup>⌘</sup></b>          |                        |   |                 |
| <b>US &amp; Canada</b>                                   |                        |   |                 |
| <b>Outside of North America (NSI)</b>                    |                        |   |                 |

Note: Label indication 90 mg q8w (FDA) and 90 mg q12w (EMA).

Abbreviations: mg, milligram; n, number within the specified subpopulation; N, number within the overall population; NSI, no studies identified; q4w, every 4 weeks; q6w, every 6 weeks; q8w, every 8 weeks; q12w, every 12 weeks.

\*Assumption of 90 mg per interval if not explicitly indicated; †Denominator of the proportion is based on the number of patients with a specific initial maintenance regimen; <sup>ε</sup>Includes Biemans et al. 2020 study<sup>[1108]</sup> where the maintenance pattern proportions were calculated based on the number of individuals at 12 weeks instead of baseline; †Includes IV-reinduction plus 90 mg q4w dosing; ⌘Dose strength increase values occurred along a continuum therefore succinct categorization wasn't possible. Value ranges are therefore described in text.

Supplemental Table 5: Vedolizumab Dose Escalation Patterns by Region, Crohn's disease

| Maintenance pattern at the start of study                     | Maintenance pattern at follow-up | Studies recording pattern (n) | Proportion of patients, median % (range) <sup>‡</sup> |
|---------------------------------------------------------------|----------------------------------|-------------------------------|-------------------------------------------------------|
| <b>Interval Shortening (n=11)</b>                             |                                  |                               |                                                       |
| <b>US &amp; Canada</b>                                        |                                  |                               |                                                       |
| 300 mg q8w <sup>‡</sup><br>[46, 47, 110, 111, 114, 116]       | 300 mg q4w                       | 2                             | 18% (8 to 27%)                                        |
| 300 mg q8w<br>[46, 47, 114, 116]                              | 300 mg q6w                       | 1                             | 10%                                                   |
| 300 mg q8w<br>[46, 47, 110, 114]                              | 300 mg <q6w                      | 2                             | 18% (8 to 27%)                                        |
| <b>Outside of North America</b>                               |                                  |                               |                                                       |
| 300 mg q8w <sup>‡</sup><br>[44, 45, 48, 49, 51, 52, 107, 115] | 300 mg q4w                       | 6                             | 33% (12 to 79%)                                       |
| 300 mg q8w<br>[44, 45, 48, 49, 114, 116]                      | 300 mg q6w                       | 3                             | 4% (4 to 13%)                                         |
| 300 mg q8w<br>[44, 45]                                        | 300 mg q5w                       | 1                             | 2%                                                    |
| 300 mg q8w<br>[44, 45]                                        | 300 mg q7w                       | 1                             | 1%                                                    |
| 300 mg q8w<br>[42-45, 48, 49, 51, 52, 107, 112-116]           | 300 mg <q6w                      | 6                             | 24% (12 to 79%)                                       |
| <b>Dose Strength Increase (n=0)</b>                           |                                  |                               |                                                       |



Note: Label indication 300 mg q8w (FDA, EMA).

Abbreviations: mg, milligram; n, number within the specified subpopulation; N, number within the overall population; q4w, every 4 weeks; q5w, every 5 weeks; q6w, every 6 weeks; q7w, every 7 weeks; q8w, every 8 weeks.

‡Denominator of the proportion is based on the number of patients with a specific initial maintenance regimen; †Includes maintenance patterns where only the interval (eg, q8w) was reported.

Supplemental Table 6: Certolizumab pegol Dose Escalation Patterns by Region, Crohn's disease

| Maintenance pattern at the start of study | Maintenance pattern at follow-up | Studies recording pattern (n) | Proportion of patients, median % (range) |
|-------------------------------------------|----------------------------------|-------------------------------|------------------------------------------|
| <b>Interval shortening (n=1)</b>          |                                  |                               |                                          |
| <b>US &amp; Canada</b>                    |                                  |                               |                                          |
| 400 mg q4w<br>[89, 90]                    | 400 mg q2w                       | 1                             | 17%                                      |
| 400 mg q4w<br>[89, 90]                    | 200 mg q2w                       | 1                             | 37%                                      |
| <b>Outside of North America (NR)</b>      |                                  |                               |                                          |
| <b>Dose Strength increase (n=1)</b>       |                                  |                               |                                          |
| <b>US &amp; Canada</b>                    |                                  |                               |                                          |
| 200 mg q2w<br>[89, 90]                    | 400 mg q2w                       | 1                             | 18%                                      |
| <b>Outside of North America (NR)</b>      |                                  |                               |                                          |

Note: Label indication 400 mg q4w (FDA).

Abbreviations: mg, milligram; n, number within the specified subpopulation; N, number within the overall population; NR, not reported; q2w, every 2 weeks; q4w, every 4 weeks.

Supplemental Table 7: Adalimumab Dose Escalation Patterns by Region, Crohn's disease

| Maintenance pattern at the start of study*         | Maintenance pattern at follow-up | Studies recording pattern (n) | Proportion of patients, median % (range)† |
|----------------------------------------------------|----------------------------------|-------------------------------|-------------------------------------------|
| <b>Interval shortening (n=18)</b>                  |                                  |                               |                                           |
| <b>US &amp; Canada</b>                             |                                  |                               |                                           |
| 40 mg EOW<br>[70, 117, 118]                        | 40 mg EW                         | 2                             | 43% (40 to 45%)                           |
| <b>Outside of North America</b>                    |                                  |                               |                                           |
| 40 mg EOW<br>[53, 54, 59-69, 71, 72, 118, 120-128] | 40 mg EW                         | 17‡                           | 29% (14 to 77%)                           |
| <b>Dose strength increase (n=4)</b>                |                                  |                               |                                           |
| <b>US &amp; Canada</b>                             |                                  |                               |                                           |
| 40 mg<br>[54, 71, 72, 117]                         | 80 mg                            | 1                             | 5%                                        |
| <b>Outside of North America</b>                    |                                  |                               |                                           |
| 40 mg<br>[54, 71, 72]                              | 80 mg                            | 1                             | 12%                                       |

Note: Label indication 40 mg q2w (FDA, EMA).

Abbreviations: EOW, every other week; EW, every week; mg, milligram; n, number within the specified subpopulation; N, number within the overall population; NR, not reported.

\*40 mg EOW assumed if dosage not reported; †Denominator of the proportion is based on the number of patients with a specific initial maintenance regimen; ‡Including Barberio et al. 2020<sup>[128]</sup> which reported “NR” for the proportion of patients dose escalated.

Supplemental Table 8: Infliximab Dose Escalation Patterns by Region, Crohn’s disease

| Maintenance pattern at the start of study                                      | Maintenance pattern at follow-up | Studies recording pattern (n) | Proportion of patients, median % (range)† |
|--------------------------------------------------------------------------------|----------------------------------|-------------------------------|-------------------------------------------|
| <b>Interval shortenings (n=17)</b>                                             |                                  |                               |                                           |
| <b>US &amp; Canada (NR)</b>                                                    |                                  |                               |                                           |
| <b>Outside of North America</b>                                                |                                  |                               |                                           |
| q8w<br>[53, 64, 65, 67, 69, 75, 76, 79, 80, 82, 83, 85-87, 211]                | q4-7w                            | 7                             | 20% (3 to 87%)                            |
| q8w<br>[53, 69, 73, 84, 86, 87, 128]                                           | q4w                              | 4                             | 8% (3 to 20%)                             |
| q8w<br>[53, 69, 73, 75, 83, 86, 87, 128]                                       | q6w                              | 5                             | 20% (3 to 87%)                            |
| q8w<br>[73, 74, 86, 87, 138]                                                   | q7w                              | 1                             | 9%                                        |
| <b>Dose strength increase (n=19)</b>                                           |                                  |                               |                                           |
| <b>US &amp; Canada</b>                                                         |                                  |                               |                                           |
| 5 mg/kg<br>[81, 129-133]                                                       | >5 mg/kg                         | 1                             | 11%                                       |
| 5 mg/kg<br>[81, 129-131, 133]                                                  | 10 mg/kg                         | 1                             | 8%                                        |
| 5 mg/kg<br>[139, 140]                                                          | 7.5 mg/kg                        | 1                             | 4%                                        |
| <b>Outside of North America</b>                                                |                                  |                               |                                           |
| 5 mg/kg<br>[53, 54, 64, 65, 67, 69, 73-75, 77-80, 82, 83, 85-88, 128, 134-139] | >5 mg/kg                         | 15                            | 14% (3 to 67%)                            |
| 5 mg/kg<br>[53, 54, 64, 65, 67, 69, 73-75, 77-80, 82-88, 128, 134-140]         | 10 mg/kg                         | 15                            | 14% (3 to 67%)                            |

Note: Label indication 5 mg/kg q8w (FDA, EMA).

Abbreviations: kg, kilogram; mg, milligram; n, number within the specified subpopulation; N, number within the overall population; NR, not reported; q4w, every 4 weeks; q4-7w, every 4-7 weeks; q6w, every 6 weeks; q7w, every 7 weeks; q8w, every 8 weeks.

†Denominator of the proportion is based on number of patients with a specific initial maintenance regimen.

Supplemental Table 9: Reported reasons for dose escalation in UC publications

| Intervention       | N of studies reporting | Reason for dose escalation                                                                                                                                |
|--------------------|------------------------|-----------------------------------------------------------------------------------------------------------------------------------------------------------|
| <b>Tofacitinib</b> | 1                      | Relapsed 52 weeks after achieving remission <sup>[157]</sup>                                                                                              |
| <b>Ustekinumab</b> | 1                      | No/minimal response to induction, loss of response during maintenance, endoscopic inflammation, elevated CRP, or fecal calprotectin <sup>[159, 160]</sup> |

|                    |   |                                                                                        |
|--------------------|---|----------------------------------------------------------------------------------------|
| <b>Vedolizumab</b> | 1 | Continued clinical activity or objective evidence of continued inflammation [154, 155] |
|                    | 5 | Partial response, no response, loss of response [44-47, 51, 52, 115, 141-143]          |
| <b>Golimumab</b>   | 1 | Weight >80 kg [167, 231]                                                               |
|                    | 2 | Partial response, no response, loss of response [151-153]                              |
|                    | 1 | Decision by physician based on the clinical symptoms [171]                             |
| <b>Adalimumab</b>  | 2 | Partial response, no response, loss of response [128, 144, 145]                        |
| <b>Infliximab</b>  | 6 | Partial response, no response, loss of response [128, 137, 146-150]                    |

Abbreviations: CRP, C-reactive protein; kg, kilogram; N, number within the overall study population UC, ulcerative colitis.

Supplemental Table 10: Ustekinumab Dose Escalation Patterns by Region, Ulcerative Colitis

| Maintenance pattern at the start of study | Maintenance pattern at follow-up | Studies recording pattern (n) | Proportion of patients, median % (range)† |
|-------------------------------------------|----------------------------------|-------------------------------|-------------------------------------------|
| <b>Interval shortening (n=3)</b>          |                                  |                               |                                           |
| <b>US &amp; Canada</b>                    |                                  |                               |                                           |
| 90 mg q8w [159, 160]                      | 90 mg q6w                        | 1                             | 12%                                       |
| 90 mg q8w [158]                           | 90 mg q4w                        | 1                             | 47%                                       |
| q12w or q8w [158-160]                     | q6w or q4w                       | 2                             | 30% (12 to 47%)                           |
| <b>Outside of North America</b>           |                                  |                               |                                           |
| q12w or q8w [161-163]                     | q6w or q4w                       | 1                             | 27%                                       |
| <b>Dose strength increase (n=0)</b>       |                                  |                               |                                           |

Note: Label indication 90 mg q8w (FDA), 90 mg q12w (EMA).

Abbreviations: mg, milligram; n, number within the specified subpopulation; N, number within the overall population; q4w, every 4 weeks; q6w, every 6 weeks; q8w, every 8 weeks; q12w, every 12 weeks.

†Denominator of the proportion is based on number of patients with a specific initial maintenance regimen.

Supplemental Table 11: Vedolizumab Dose Escalation Patterns by Region, Ulcerative Colitis

| Maintenance pattern at the start of study                | Maintenance pattern at follow-up | Studies recording pattern (n) | Proportion of patients, median % (range)† |
|----------------------------------------------------------|----------------------------------|-------------------------------|-------------------------------------------|
| <b>Interval shortening (n=10)</b>                        |                                  |                               |                                           |
| <b>US &amp; Canada</b>                                   |                                  |                               |                                           |
| 300 mg q8w [46, 47, 111, 141-143, 154, 155, 164]         | 300 mg ≤q6w                      | 6*                            | 25% (6 to 44%)                            |
| 300 mg q8w [164]                                         | 300 mg q6w                       | 1                             | 5%                                        |
| 300 mg q8w [44-47, 92, 111, 115, 141-143, 154, 155, 164] | 300 mg q4w                       | 6*                            | 20% (6 to 44%)                            |

| <b>Outside of North America</b>                 |                                  |   |                 |
|-------------------------------------------------|----------------------------------|---|-----------------|
| 300 mg q8w<br>[42-45, 48, 49, 51, 52, 112, 115] | 300 mg ≤q6w                      | 4 | 25% (13 to 63%) |
| 300 mg q8w<br>[44, 45, 48, 49]                  | 300 mg q6w                       | 2 | 7% (6 to 7%)    |
| 300 mg q8w<br>[48, 49, 51, 52, 115]             | 300 mg q4w                       | 3 | 32% (12 to 56%) |
| <b>Dose strength increase (n=1)</b>             |                                  |   |                 |
| <b>US &amp; Canada (NSI)</b>                    |                                  |   |                 |
| <b>Outside of North America</b>                 |                                  |   |                 |
| 300 mg q8w<br>[7, 165]                          | 1.8 times recommended daily dose | 1 | 50%             |

Note: Label indication 300 mg q8w (FDA, EMA).

Abbreviations: mg, milligram; n, number within the specified subpopulation; N, number within the overall population; NSI, no studies identified; q4w, every 4 weeks; q6w, every 6 weeks; q8w, every 8 weeks.

†Proportion calculated based on overall number of individuals who started on maintenance treatment; \*Includes one study that did not report the number of individuals dose escalated<sup>[111]</sup>.

Supplemental Table 12: Golimumab Dose Escalation Patterns by Region, Ulcerative Colitis

| <b>Maintenance pattern at the start of study</b> | <b>Maintenance pattern at follow-up</b> | <b>Studies recording pattern (n)</b> | <b>Proportion of patients, median % (range)†</b> |
|--------------------------------------------------|-----------------------------------------|--------------------------------------|--------------------------------------------------|
| <b>Interval shortening (n=1)</b>                 |                                         |                                      |                                                  |
| <b>US &amp; Canada (NSI)</b>                     |                                         |                                      |                                                  |
| <b>Outside of North America</b>                  |                                         |                                      |                                                  |
| 100 mg q4w<br>[152, 153, 171, 172]               | 100 mg q2w                              | 1                                    | NR*                                              |
| <b>Dose strength increase (n=6)</b>              |                                         |                                      |                                                  |
| <b>US &amp; Canada (NSI)</b>                     |                                         |                                      |                                                  |
| <b>Outside of North America</b>                  |                                         |                                      |                                                  |
| 50 mg<br>[151-153, 168-172]                      | 100 mg                                  | 4                                    | 76% (16 to 83%)                                  |

Note: Label indication 100 mg q4w (>80 kg), 50 mg q8w (<80 kg) (EMA).

Abbreviations: kg, kilogram; mg, milligram; n, number within the specified subpopulation; NR, not reported; NSI, no studies identified; q4w, every 4 weeks.

†Denominator of the proportion is based on the number of patients with a specific initial maintenance regimen; \*Despite reports of interval shortening in 2% of patients, the number of individuals dose escalated from a known starting dose was not reported.

Supplemental Table 13: Adalimumab Dose Escalation Patterns by Region, Ulcerative Colitis

| <b>Maintenance pattern at the start of study</b> | <b>Maintenance pattern at follow-up</b> | <b>Studies recording pattern (n)</b> | <b>Proportion of patients, median % (range)†</b> |
|--------------------------------------------------|-----------------------------------------|--------------------------------------|--------------------------------------------------|
| <b>Interval shortening (n=7)</b>                 |                                         |                                      |                                                  |
| <b>US &amp; Canada (NSI)</b>                     |                                         |                                      |                                                  |
| <b>Outside of North America</b>                  |                                         |                                      |                                                  |
| 40 mg EOW                                        | 40 mg EW                                | 7                                    | 39% (30 to 56%)                                  |

|                                           |                                   |   |                |
|-------------------------------------------|-----------------------------------|---|----------------|
| [62, 128, 144, 145, 173-177, 179-183]     |                                   |   |                |
| 40 mg EOW<br>[144, 145]                   | 40 mg q10d                        | 1 | 1%             |
| <b>Dose strength increase (n=4)</b>       |                                   |   |                |
| <b>North America (NSI)</b>                |                                   |   |                |
| <b>Outside of North America</b>           |                                   |   |                |
| 40 mg EOW<br>[144, 145]                   | 80 mg EOW                         | 1 | 2%             |
| 40 mg EOW<br>[7, 144, 145, 165, 178, 179] | Avg. biweekly<br>dose $\geq$ 50mg | 4 | 22% (2 to 74%) |

Note: Label indication 40 mg EOW (FDA, EMA).

Abbreviations: EW, every week; EOW, every other week; mg, milligram; n, number within the specified subpopulation; N, number within the overall population; NSI, no studies identified; q10d, every 10 days.

†Denominator of the proportion is based on the number of patients with a specific initial maintenance regimen.

Supplemental Table 14: Infliximab Dose Escalation Patterns by Region, Ulcerative Colitis

| Maintenance pattern at the start of study                      | Maintenance pattern at follow-up | Studies recording pattern (n) | Proportion of patients, median % (range)† |
|----------------------------------------------------------------|----------------------------------|-------------------------------|-------------------------------------------|
| <b>Interval shortening (n=8)</b>                               |                                  |                               |                                           |
| <b>US &amp; Canada (NR)</b>                                    |                                  |                               |                                           |
| <b>Outside of North America</b>                                |                                  |                               |                                           |
| 5 mg/kg q8w<br>[128, 147-150, 188-190]                         | 5 mg/kg <q8w                     | 2                             | 23% (21 to 25%)                           |
| 5 mg/kg q8w<br>[128, 147, 148, 150, 188, 189]                  | 5 mg/kg q6w                      | 2                             | 20% (15 to 25%)                           |
| 5 mg/kg q8w<br>[128, 147, 148, 150]                            | 5 mg/kg q4w                      | 1                             | 6%                                        |
| <b>Dose strength increase (n=7)</b>                            |                                  |                               |                                           |
| <b>US &amp; Canada</b>                                         |                                  |                               |                                           |
| 5 mg/kg q8w<br>[129, 130, 132]                                 | >5 mg/kg                         | 1                             | 27%                                       |
| <b>Outside of North America</b>                                |                                  |                               |                                           |
| 5 mg/kg q8w<br>[137, 146-150, 186, 187, 189, 190]              | 10 mg/kg q8w                     | 5                             | 10% (5 to 38%)                            |
| 5 mg/kg q8w<br>[150, 189]                                      | 10 mg/kg q4-6w                   | 2                             | 14% (7 to 21%)                            |
| 5 mg/kg q8w<br>[7, 132, 137, 147-150, 165, 186, 187, 189, 190] | >5 mg/kg                         | 6                             | 33% (12 to 65%)                           |

Note: Label indication 5 mg/kg q8w (FDA, EMA).

Abbreviations: kg, kilogram; mg, milligram; n, number within the specified subpopulation; N, number within the overall population; NR, not reported; q4w, every 4 weeks; q4-6w, every 4-6 weeks; q6w, every 6 weeks; q8w, every 8 weeks.

†Denominator of the proportion is based on number of patients with a specific initial maintenance regimen.
